# Supplementary material for: Illuminating the Characteristics and Assembly of Prokaryotic Communities across a pH Gradient in Pit Muds for the Production of Chinese Strong-Flavor Baijiu
Source: MDPI journal article supplement (doi:10.3390/foods13081196), 2024-04-15
Supplement: s1 [file s1]

**Table S1.** Spearman's correlation was calculated among physicochemical properties.

|             | <b>pH</b> | <b>TA</b> | <b>AN</b> | <b>AP</b> | <b>Mo</b> |
|-------------|-----------|-----------|-----------|-----------|-----------|
| pH          | 1         |           |           |           |           |
| TA          | -0.912**  | 1         |           |           |           |
| AN          | 0.690**   | -0.717**  | 1         |           |           |
| AP          | 0.254*    | -0.176    | 0         | 1         |           |
| Mo          | 0.213*    | -0.099    | 0.502**   | 0.056     | 1         |
| sample size | 87        | 87        | 87        | 87        | 87        |

\* Spearman's  $P < 0.05$

\*\* Spearman's  $P < 0.01$

**Table S2.** Relative abundance of the prokaryotes in PMs at the genus level

| group                               | A            | B            | C            | D                  | E                  | F              |
|-------------------------------------|--------------|--------------|--------------|--------------------|--------------------|----------------|
| subgroup                            | acidic group | acidic group | acidic group | Near-neutral group | Near-neutral group | alkaline group |
| <i>Lactobacillus</i>                | 76.12        | 22.86        | 5.45         | 1.02               | 1.76               | 0.31           |
| <i>Caproiciproducens</i>            | 1.88         | 14.26        | 20.68        | 23.39              | 7.46               | 6.04           |
| <i>Proteiniphilum</i>               | 0.59         | 4.33         | 6.88         | 6.13               | 18.47              | 9.73           |
| <i>Petrimonas</i>                   | 0.42         | 2.59         | 6.19         | 3.49               | 8.17               | 7.77           |
| <i>Hydrogenispora</i>               | 0.32         | 1.92         | 5.51         | 3.32               | 3.25               | 7.86           |
| <i>Clostridium_sensu_stricto_12</i> | 3.11         | 3.72         | 2.28         | 2.31               | 2.96               | 1.27           |
| <i>Sedimentibacter</i>              | 0.44         | 2.12         | 3.17         | 4.86               | 3.51               | 4.21           |
| <i>Aminobacterium</i>               | 0.11         | 2.17         | 4.07         | 2.50               | 4.58               | 2.61           |
| <i>Syntrophomonas</i>               | 0.29         | 1.44         | 2.29         | 2.28               | 3.31               | 3.93           |
| <i>Acinetobacter</i>                | 4.26         | 0.70         | 0.03         | 0.02               | 0.01               | 0.07           |
| <i>Methanoculleus</i>               | 0.09         | 0.27         | 2.78         | 0.50               | 0.96               | 2.27           |
| Others                              | 9.37         | 27.53        | 23.67        | 26.72              | 19.86              | 28.83          |
| Unclassified                        | 2.98         | 16.08        | 17.00        | 23.47              | 25.69              | 25.06          |

**Table S3.** Samples grouping and size information.

| group       | A            | B            | C            | D                  | E                  | F              |
|-------------|--------------|--------------|--------------|--------------------|--------------------|----------------|
| subgroup    | acidic group | acidic group | acidic group | near-neutral group | near-neutral group | alkaline group |
| pH range    | 4>pH≥3       | 5>pH≥4       | 6>pH≥5       | 7>pH≥6             | 8>pH≥7             | 9>pH≥8         |
| sample size | 16           | 31           | 16           | 5                  | 4                  | 14             |

**Table S4.** The topology of co-occurrence networks

|                         | Acidic group | Near-neutral group | Alkaline group |
|-------------------------|--------------|--------------------|----------------|
| Node                    | 434          | 113                | 210            |
| Edge                    | 4727         | 118                | 288            |
| Average Weight Distance | 15.04        | 2.03               | 2.54           |
| Diameter                | 9            | 7                  | 10             |
| Average Path Length     | 3.458        | 1.722              | 3.677          |
| Density                 | 0.05         | 0.02               | 0.01           |
| Modularity index        | 0.64         | 0.94               | 0.87           |
